# Supplementary material for: Hydration structure of strongly bound water on the sulfonic acid group in a Nafion membrane studied by infrared spectroscopy and quantum chemical calculation
Source: Royal Society of Chemistry journal article supplement (doi:10.1039/c5cp00567a), 2015-01-01
Supplement: c5cp00567a1.pdf [file c5cp00567a1.pdf]

**Table S1** Structural parameters of CF<sub>3</sub>CF<sub>2</sub>SO<sub>3</sub>H (Each column is presented atomic number, coordinate x-, y-, and z-coordinates (10<sup>-10</sup> m))

|    |              |              |              |
|----|--------------|--------------|--------------|
| 16 | 1.370445000  | -0.350777000 | 0.027985000  |
| 8  | 2.388507000  | 0.913600000  | -0.098050000 |
| 8  | 1.565102000  | -0.916370000 | 1.344878000  |
| 8  | 1.408388000  | -1.120835000 | -1.206728000 |
| 1  | 2.556962000  | 1.099566000  | -1.039834000 |
| 6  | -0.257198000 | 0.620394000  | 0.040940000  |
| 9  | -0.241775000 | 1.438364000  | -1.035429000 |
| 9  | -0.287383000 | 1.359532000  | 1.161756000  |
| 6  | -1.538202000 | -0.262594000 | -0.021277000 |
| 9  | -2.614960000 | 0.526194000  | 0.117781000  |
| 9  | -1.529058000 | -1.165019000 | 0.968605000  |
| 9  | -1.616563000 | -0.897414000 | -1.195680000 |

**Table S2** Structural parameters of molecular clusters presented in Fig. 4 (Each column is presented atomic number, coordinate x-, y-, and z-coordinates ( $10^{-10}$  m))

(a) #3(ion)

|    |              |              |              |
|----|--------------|--------------|--------------|
| 16 | -0.407016000 | 0.023938000  | -0.092124000 |
| 8  | -0.561851000 | -1.263641000 | 0.631583000  |
| 8  | -0.606635000 | 1.240598000  | 0.735032000  |
| 8  | -1.151029000 | 0.065551000  | -1.397647000 |
| 6  | 1.392127000  | 0.077621000  | -0.651030000 |
| 9  | 1.589378000  | 1.255059000  | -1.282027000 |
| 9  | 1.580972000  | -0.930364000 | -1.529609000 |
| 6  | 2.461080000  | -0.056126000 | 0.473018000  |
| 9  | 3.683392000  | 0.072919000  | -0.077646000 |
| 9  | 2.388908000  | -1.254527000 | 1.065278000  |
| 9  | 2.309476000  | 0.900345000  | 1.398279000  |
| 1  | -3.645774000 | 0.808489000  | -0.148360000 |
| 8  | -3.636835000 | -0.006399000 | -0.780443000 |
| 1  | -3.617601000 | -0.869294000 | -0.216655000 |
| 1  | -2.707664000 | 0.025949000  | -1.210457000 |
| 8  | -3.189826000 | -2.054800000 | 0.654044000  |
| 1  | -3.375832000 | -2.967551000 | 0.400810000  |
| 1  | -2.211748000 | -1.959790000 | 0.759077000  |
| 8  | -3.261222000 | 1.935590000  | 0.813454000  |
| 1  | -2.280490000 | 1.866529000  | 0.914108000  |
| 1  | -3.477828000 | 2.857635000  | 0.626863000  |

(d) #3(neutral)

|    |              |              |              |
|----|--------------|--------------|--------------|
| 16 | -0.105930000 | -0.083193000 | 0.938705000  |
| 8  | -0.936006000 | -1.411329000 | 0.911556000  |
| 8  | 0.389220000  | 0.157370000  | 2.281062000  |
| 8  | -0.782085000 | 0.979449000  | 0.180132000  |
| 1  | -1.634897000 | -1.500251000 | 0.114185000  |
| 6  | 1.368863000  | -0.595112000 | -0.129556000 |
| 9  | 0.885424000  | -1.127494000 | -1.274042000 |
| 9  | 2.051826000  | -1.542264000 | -0.542676000 |
| 6  | 2.350621000  | 0.554311000  | -0.500151000 |
| 9  | 3.411272000  | 0.031369000  | -1.139938000 |
| 9  | 2.780599000  | 1.182469000  | 0.602217000  |
| 9  | 1.762027000  | 1.443649000  | -1.309981000 |
| 8  | -2.603932000 | -1.666154000 | -0.903693000 |
| 1  | -3.443700000 | -1.125957000 | -0.804845000 |
| 1  | -2.831398000 | -2.559149000 | -1.188380000 |
| 8  | -4.666535000 | -0.070925000 | -0.616377000 |
| 1  | -5.337505000 | -0.220170000 | 0.060869000  |
| 1  | -4.269360000 | 0.818317000  | -0.433416000 |
| 8  | -3.329418000 | 2.189490000  | -0.015609000 |
| 1  | -3.285743000 | 2.959797000  | -0.595163000 |
| 1  | -2.409711000 | 1.890551000  | 0.120769000  |

(b) #2(ion)

|    |              |              |              |
|----|--------------|--------------|--------------|
| 16 | 1.676983000  | -0.147612000 | -0.141776000 |
| 8  | 1.731372000  | -0.964736000 | 1.165702000  |
| 8  | 1.732013000  | -0.985624000 | -1.356924000 |
| 8  | 2.619791000  | 0.982221000  | -0.129893000 |
| 6  | -0.061611000 | 0.566825000  | -0.005272000 |
| 9  | -0.255904000 | 1.314817000  | -1.114236000 |
| 9  | -0.097871000 | 1.366178000  | 1.078560000  |
| 6  | -1.234130000 | -0.455097000 | 0.097605000  |
| 9  | -2.395404000 | 0.224729000  | 0.089651000  |
| 9  | -1.166580000 | -1.161057000 | 1.231979000  |
| 9  | -1.228771000 | -1.299122000 | -0.942793000 |
| 1  | 4.414439000  | -1.899882000 | -1.696451000 |
| 8  | 4.560326000  | -1.192391000 | -1.049267000 |
| 1  | 4.195807000  | -1.632830000 | 0.246930000  |
| 1  | 3.911025000  | -0.501896000 | -1.319487000 |
| 8  | 3.927821000  | -1.956631000 | 1.199865000  |
| 1  | 3.914899000  | -2.923067000 | 1.233157000  |
| 1  | 2.876001000  | -1.493199000 | 1.324361000  |

(e) #2(neutral)

|    |              |              |              |
|----|--------------|--------------|--------------|
| 16 | 0.440201000  | -0.887790000 | -0.597989000 |
| 8  | 1.445750000  | -1.515292000 | 0.433887000  |
| 8  | -0.208961000 | -1.944435000 | -1.348211000 |
| 8  | 1.035160000  | 0.267906000  | -1.283743000 |
| 1  | 2.218508000  | -0.877843000 | 0.748462000  |
| 6  | -0.833602000 | -0.171512000 | 0.603291000  |
| 9  | -0.170085000 | 0.648650000  | 1.451290000  |
| 9  | -1.366592000 | -1.191552000 | 1.300834000  |
| 6  | -1.988553000 | 0.637849000  | -0.054181000 |
| 9  | -2.849723000 | 1.023110000  | 0.903013000  |
| 9  | -2.644653000 | -0.111227000 | -0.948070000 |
| 9  | -1.513009000 | 1.733142000  | -0.664444000 |
| 8  | 3.331157000  | -0.043450000 | 1.212586000  |
| 1  | 3.455943000  | 0.732143000  | 0.602356000  |
| 1  | 4.180252000  | -0.495371000 | 1.298979000  |
| 8  | 3.304965000  | 1.841264000  | -0.658929000 |
| 1  | 3.164914000  | 2.785008000  | -0.513119000 |
| 1  | 2.502071000  | 1.495623000  | -1.091847000 |

(c) #1(ion)\*

|    |              |              |              |
|----|--------------|--------------|--------------|
| 16 | 1.418000000  | -0.291387000 | -0.014366000 |
| 8  | 1.492918000  | -1.093829000 | 1.242853000  |
| 8  | 1.460597000  | -1.132953000 | -1.242668000 |
| 8  | 2.482202000  | 0.776178000  | -0.042810000 |
| 6  | -0.228659000 | 0.629409000  | -0.005476000 |
| 9  | -0.269832000 | 1.401014000  | -1.109239000 |
| 9  | -0.250928000 | 1.413435000  | 1.089259000  |
| 6  | -1.498521000 | -0.274393000 | 0.008778000  |
| 9  | -2.584563000 | 0.519754000  | 0.036566000  |
| 9  | -1.514869000 | -1.060760000 | 1.091609000  |
| 9  | -1.552957000 | -1.035569000 | -1.090546000 |
| 1  | 3.383398000  | -1.639417000 | 0.780162000  |
| 8  | 3.957282000  | -1.372231000 | 0.004565000  |
| 1  | 3.756621000  | -0.361427000 | -0.013688000 |
| 1  | 3.392064000  | -1.668090000 | -0.766240000 |

(f) #1(neutral)

|    |              |              |              |
|----|--------------|--------------|--------------|
| 16 | -0.890667000 | 0.785398000  | 0.169683000  |
| 8  | -1.994889000 | 0.503089000  | -0.945504000 |
| 8  | -1.280845000 | 0.126903000  | 1.419095000  |
| 8  | -0.502164000 | 2.180166000  | 0.115623000  |
| 1  | -2.614674000 | -0.231175000 | -0.625294000 |
| 6  | 0.528404000  | -0.229916000 | -0.563536000 |
| 9  | 0.818900000  | 0.280611000  | -1.774247000 |
| 9  | 0.084390000  | -1.497597000 | -0.708200000 |
| 6  | 1.829174000  | -0.258770000 | 0.290398000  |
| 9  | 2.755046000  | -0.986247000 | -0.356379000 |
| 9  | 1.598815000  | -0.821138000 | 1.484320000  |
| 9  | 2.303355000  | 0.979436000  | 0.472943000  |
| 8  | -3.452493000 | -1.361669000 | 0.178687000  |
| 1  | -4.411397000 | -1.289533000 | 0.270924000  |
| 1  | -3.070150000 | -1.297046000 | 1.069124000  |

**Table S2** Structural parameters of RfSO<sub>3</sub><sup>-</sup> and #4(ion), the spectra of which are presented in Fig. 5 (Each column is presented atomic number, coordinate x-, y-, and z-coordinates (10<sup>-10</sup> m))

RfSO<sub>3</sub><sup>-</sup>

|    |              |              |              |
|----|--------------|--------------|--------------|
| 16 | 1.497808000  | -0.235448000 | -0.000529000 |
| 8  | 1.487671000  | -0.983923000 | 1.277615000  |
| 8  | 1.444852000  | -1.065046000 | -1.226855000 |
| 8  | 2.407024000  | 0.931380000  | -0.053432000 |
| 6  | -0.208527000 | 0.616941000  | 0.000470000  |
| 9  | -0.319015000 | 1.420483000  | -1.100230000 |
| 9  | -0.315123000 | 1.419539000  | 1.102138000  |
| 6  | -1.468645000 | -0.286879000 | 0.000142000  |
| 9  | -2.590964000 | 0.488419000  | 0.038799000  |
| 9  | -1.514081000 | -1.096348000 | 1.070466000  |
| 9  | -1.551738000 | -1.040147000 | -1.108265000 |

#4(ion)

|    |              |              |              |
|----|--------------|--------------|--------------|
| 16 | -0.058056000 | -0.023759000 | 0.095420000  |
| 8  | -0.036538000 | 1.358455000  | 0.633969000  |
| 8  | 0.041140000  | -1.104179000 | 1.105685000  |
| 8  | 0.880655000  | -0.219037000 | -1.069450000 |
| 6  | -1.744576000 | -0.230875000 | -0.721580000 |
| 9  | -1.850185000 | -1.516931000 | -1.117436000 |
| 9  | -1.781105000 | 0.569883000  | -1.807558000 |
| 6  | -2.973722000 | 0.110423000  | 0.172013000  |
| 9  | -4.096165000 | -0.209272000 | -0.498817000 |
| 9  | -3.009657000 | 1.417281000  | 0.458224000  |
| 9  | -2.946732000 | -0.589176000 | 1.314398000  |
| 1  | 3.172218000  | -0.695277000 | 0.581641000  |
| 8  | 3.222467000  | 0.021790000  | -0.165324000 |
| 1  | 3.123052000  | 0.953294000  | 0.276731000  |
| 1  | 2.320626000  | -0.099631000 | -0.674212000 |
| 8  | 2.574736000  | 2.204592000  | 0.932952000  |
| 1  | 2.822868000  | 3.095555000  | 0.656757000  |
| 1  | 1.591558000  | 2.129934000  | 0.906938000  |
| 8  | 2.693938000  | -1.657170000 | 1.646547000  |
| 1  | 1.708478000  | -1.651525000 | 1.611449000  |
| 1  | 2.995458000  | -2.572712000 | 1.697855000  |
| 8  | 6.042604000  | -0.183788000 | -1.224639000 |
| 1  | 5.079398000  | -0.141515000 | -1.143013000 |
| 1  | 6.227621000  | -0.326635000 | -2.160684000 |

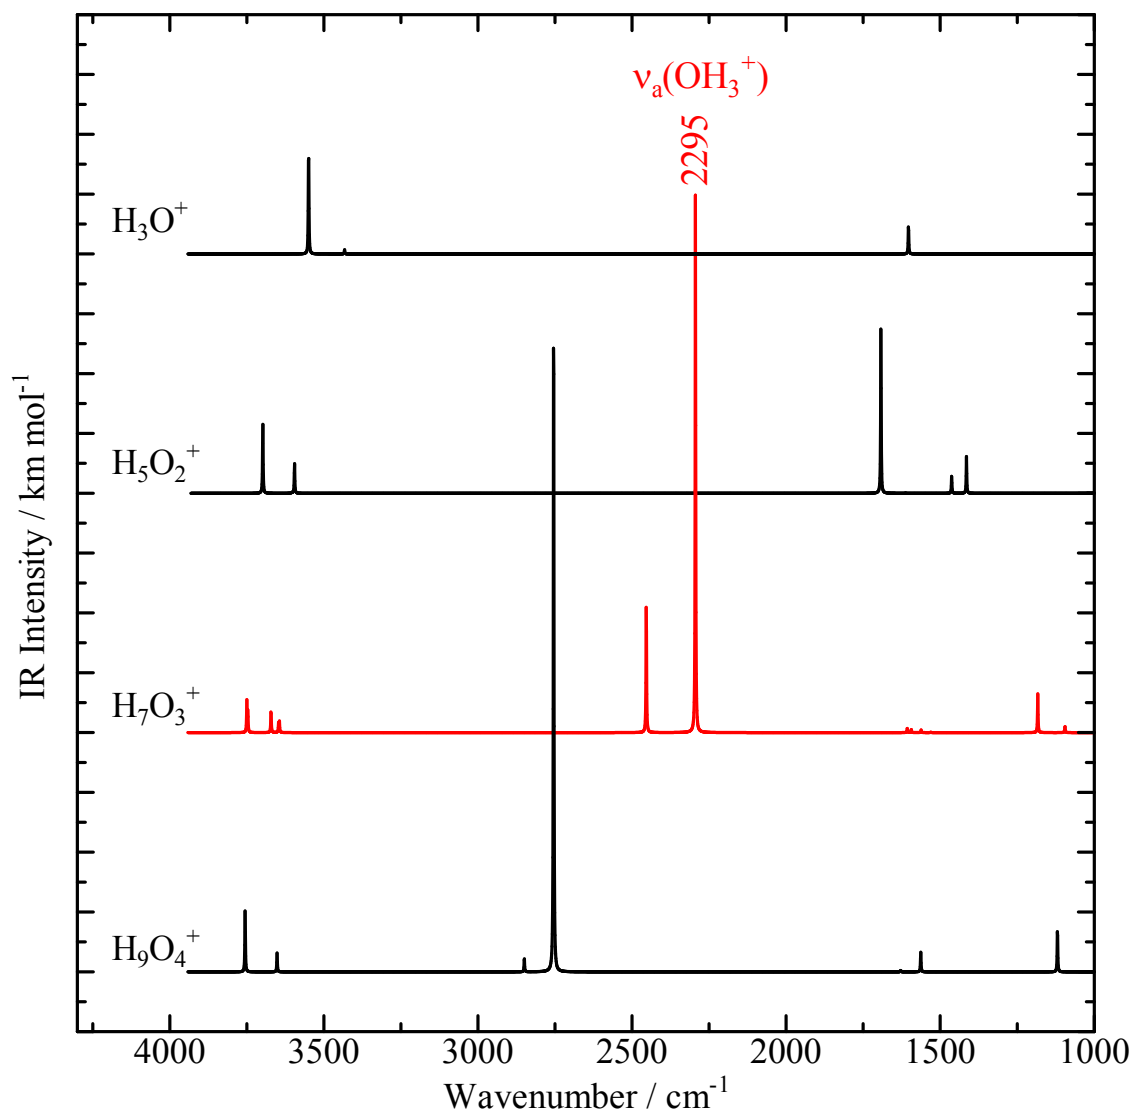

**Fig. S1** Calculated IR spectra of four kinds of hydronium ions.

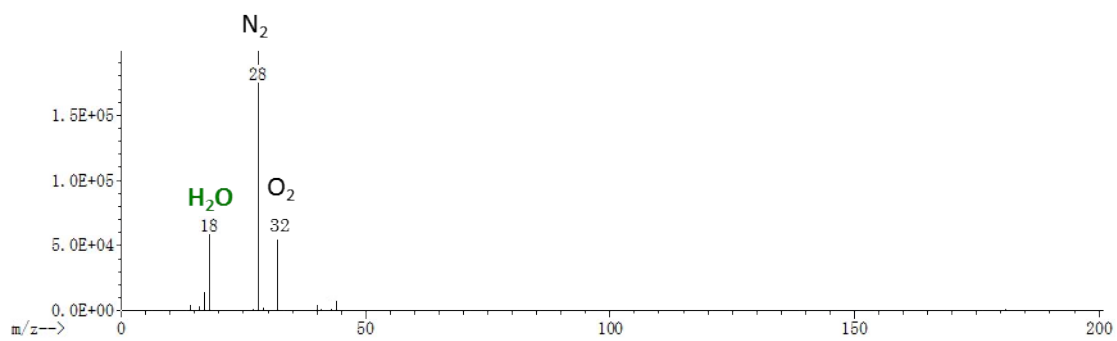

**Fig. S2** Averaged EGA-MS spectrum of the Nafion membrane measured up to ca. 200 °C (from 0 min to 30 min).

a)  $T \sim 300 \text{ }^\circ\text{C}$

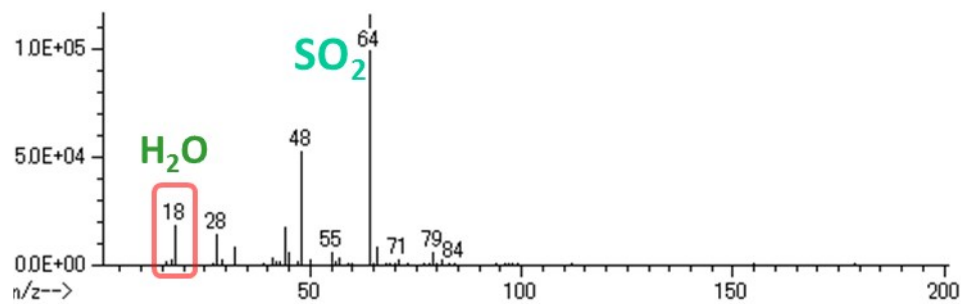

b)  $T \sim 450 \text{ }^\circ\text{C}$

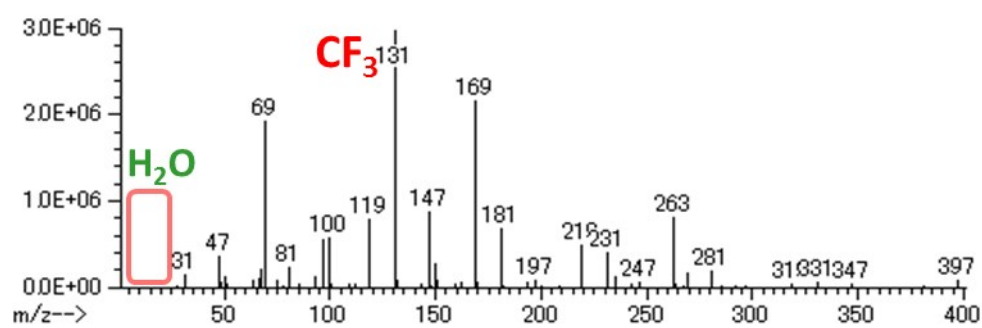

**Fig. S3** EGA-MS spectra of the Nafion membrane measured at (a) 300 °C and (b) ca. 450 °C.
